# Supplementary material for: Cytokine-Mediated Regulation of ARG1 in Macrophages and Its Impact on the Control of Salmonella enterica Serovar Typhimurium Infection
Source: MDPI journal article supplement (doi:10.3390/cells10071823), 2021-07-19
Supplement: s1 [file s1]

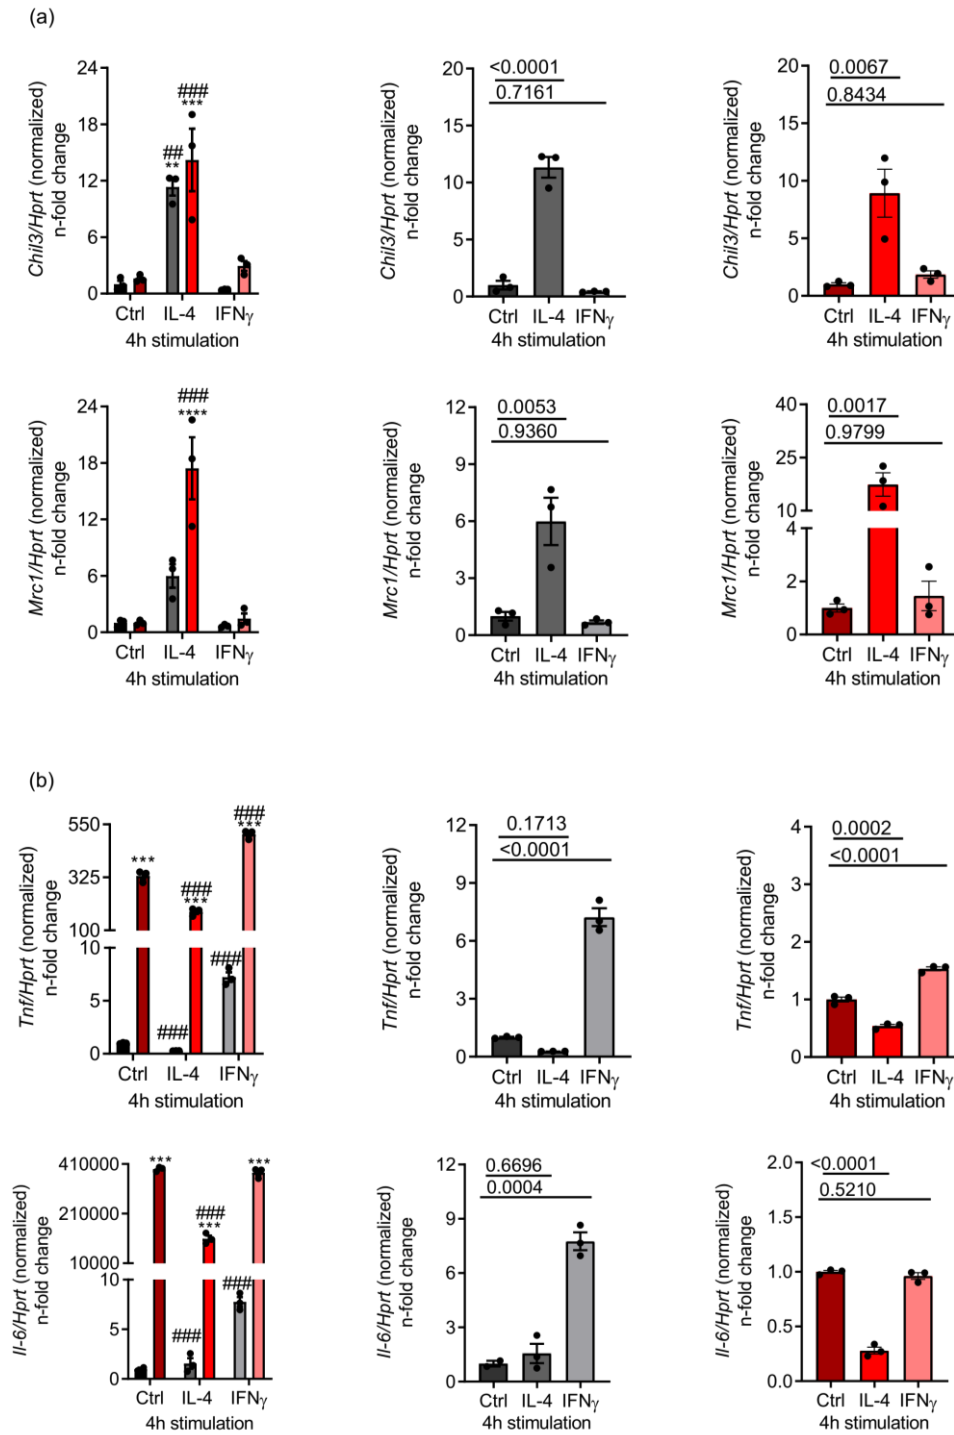

**Figure S1:** Regulation of M2 and M1 markers in macrophages. BMDM of C57BL/6N mice were uninfected (grey) and stimulated or infected (red) with *S.tn* and stimulated with IL-4 (10 ng/mL) or IFN $\gamma$  (100 ng/mL) for 4 h. Uninfected and unstimulated BMDM were used as a control. (a) Regulation of *Chil3* and *Mrc1* expression due to infection and stimulation determined by RT-qPCR analysis. mRNA levels were normalized to the control *Hprt*. Ctrl samples were set to 1. (b) Regulation of *Tnf* and *Il-6* expression due to infection and stimulation determined by RT-qPCR analysis. mRNA levels were normalized to the control *Hprt*. Ctrl samples were set to 1. Significant differences as determined by two-way ANOVA are marked \*\*;###=p-value <0.01; \*\*\*;###=p-value <0.001. \* indicates significant differences to uninfected Ctrl; # depicts significant differences to infected Ctrl. Otherwise, three groups were statistically analysed by one-way ANOVA. Exact p-values are indicated.

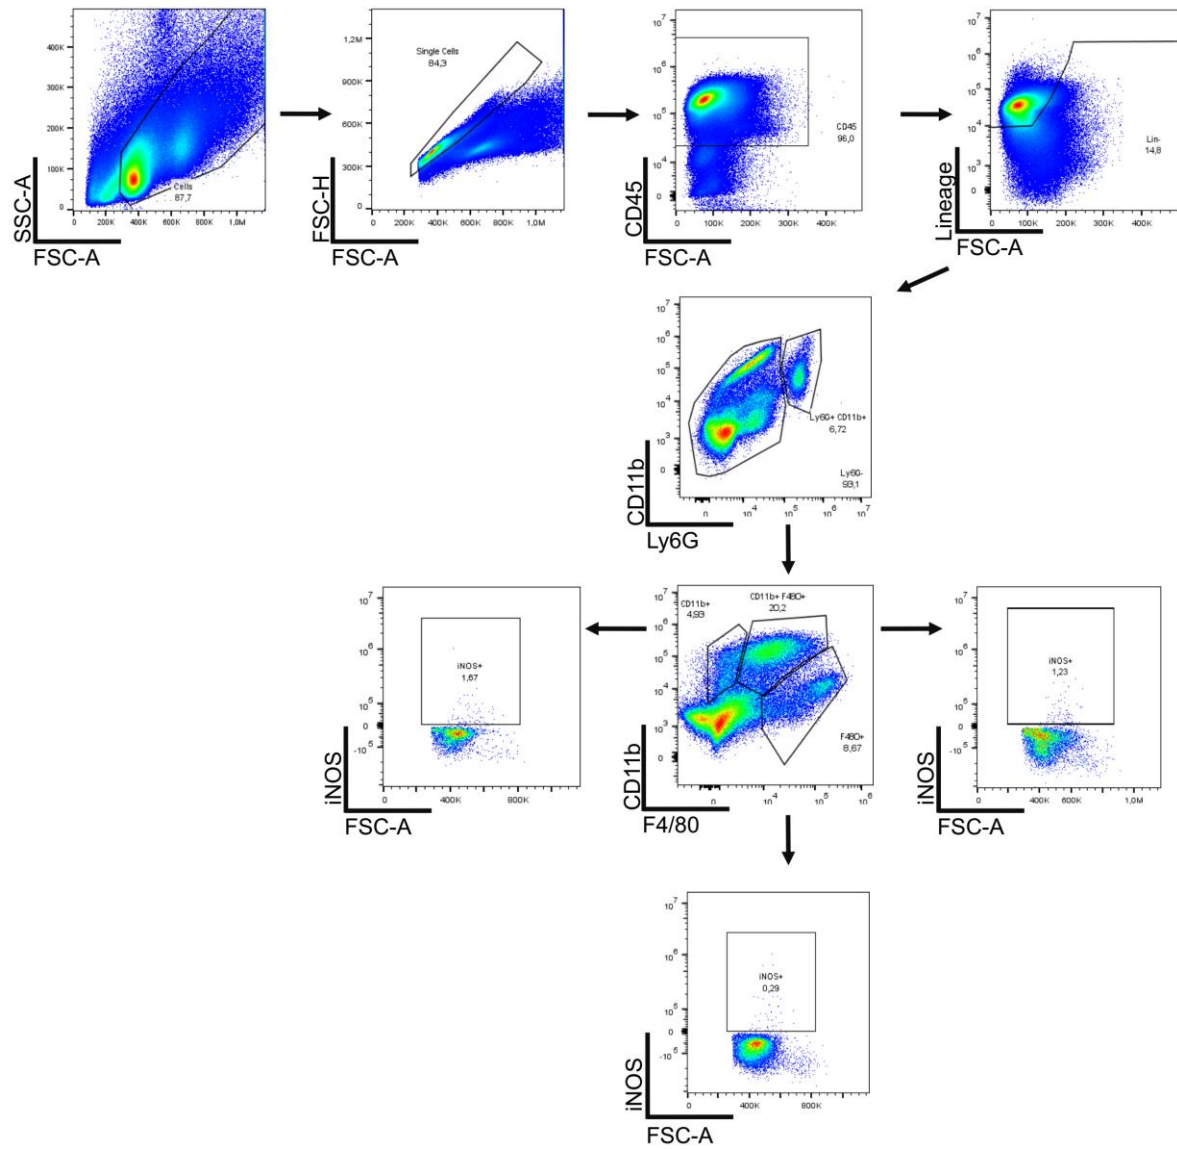

**Figure S2:** Gating strategy of *in vivo* FACS staining. Splenocytes of uninfected and infected mice were stained with various surface markers and intracellular staining against iNOS. Singlets were determined and only CD45<sup>+</sup> cells were analysed. CD3, CD19 and CD49 (lineage) positive cells were excluded and Ly6G<sup>-</sup> cells were analysed for CD11b<sup>+</sup>, F4/80<sup>+</sup> and CD11b/F4/80 double positive macrophage populations. iNOS was analysed in macrophage populations.
